## Regional Differences in Left Ventricular Wall Motion in the Anesthetized Dog

Johan Diedericks, B.A., M.Med.(Anes.), F.F.A.(S.A.),\* Bruce J. Leone, M.D.,†  
Pierre Foëx, D.M., D.Phil., F.F.A.R.C.S.‡

Data regarding left ventricular function suggest that the extent of shortening may differ between regions. This study was undertaken to determine the effects of negative inotropic drugs used during anesthesia on different areas of the left ventricle. Forty mongrel dogs were anesthetized and instrumented for measurement of global and regional function. Regional function in the short axis of the basal and apical territories of the left ventricle was assessed by sub-endocardial sonomicrometry. Three different interventions were performed: In the first group 67% N<sub>2</sub>O, replacing 67% N<sub>2</sub>, was added to opiate anesthesia; in the second group halothane was given by stepwise increases in inspired concentration to 2%; in the third group verapamil (60 µg · kg<sup>-1</sup> · h<sup>-1</sup>) was infused during isoflurane anesthesia. Apical and basal segmental shortening were compared. During baseline conditions and with agents in concentrations that caused minimal myocardial depression (67% N<sub>2</sub>O or 1.0% as opposed to 0.5% halothane) differences in systolic shortening between regions were statistically significant. Further myocardial depression affected the apex significantly more than the base: when substantial myocardial depression was induced by halothane (1.5 or 2%) or verapamil, differences in regional function were abolished. Thus, the apical region of the left ventricle is more dynamic and more sensitive to negative inotropic interventions than the basal region. This should be borne in mind when segmental myocardial function is evaluated. (Key words: Biology, physiology: heart, mechanics; regional function. Heart, contractility: regional. Heart, myocardial function: anesthetics; calcium channel inhibitors; opiates; ventricle, regional. Heart, ventricles: left ventricle; regional function.)

INVESTIGATORS INTERESTED in studying the effect of anesthesia on regional ventricular wall function in normal or compromised myocardium use sonomicrometry to measure segment length or wall thickness.<sup>1-4</sup> Uniform contraction of the left ventricle (LV) is usually assumed

when LV performance is discussed. Liedtke *et al.*, in humans,<sup>5</sup> and Kong *et al.*, in experimental animals,<sup>6</sup> found evidence suggesting nonuniform contraction of the LV. Le Winter *et al.*<sup>7</sup> confirmed in open-chested dogs that the apical region is more active than the basal region. Transesophageal echocardiography demonstrated this phenomenon recently in humans.<sup>8</sup>

However, the differential effects of anesthesia and cardiovascular drugs on regional performance have not been studied extensively. Recognition of the differences in regional performance is essential to prevent errors in the interpretation of results when regional function is evaluated. Erroneous conclusions may be drawn if results from different segments are treated as if contraction was uniform throughout the left ventricle.

Most previous studies in this laboratory were concerned with myocardial ischemia and involved critical constriction of coronary arteries. In the control stages of these studies, differences in apical and basal segment shortening, before critical coronary constriction was applied, were present. However, these differences were not analyzed in detail because they were not considered relevant to the particular studies at the time. In this study, data selected from several previous studies,<sup>2,9-11</sup> and unpublished data obtained before critical constriction of coronary arteries had been applied, were analyzed to establish whether there are significant differences between the extent of apical and basal LV myocardial shortening under different conditions of general anesthesia and, if this was confirmed, whether negative inotropic interventions have a differential effect on normal apical *versus* basal myocardium.

### Methods

#### INSTRUMENTATION

The studies were undertaken in accordance with the conditions of the Cruelty to Animals Act (1876) and the Animals (Scientific Procedures) Act (1986) of the United Kingdom. Forty mongrel dogs of either sex, weighing between 14 and 30 kg, were premedicated with morphine sulfate (1 mg · kg<sup>-1</sup>). Anesthesia was induced with sodium thiopental (10 mg · kg<sup>-1</sup>). The trachea was intubated, and constant volume intermittent positive pressure ventilation was instituted with 33% oxygen (O<sub>2</sub>) in nitrogen (N<sub>2</sub>) at a rate of 12 breaths/min, tidal volume 30 ml · kg<sup>-1</sup>. Carbon dioxide (CO<sub>2</sub>) was added to the mixture to maintain

\* Senior Lecturer/Consultant, Department of Anesthesiology, University of the Orange Free State, and Research Fellow, Nuffield Department of Anaesthetics, The Radcliffe Infirmary.

† Fellow in Cardiac Anesthesiology, Duke University Medical Center, Senior Research Fellow and Honorary Senior Registrar, Nuffield Department of Anaesthetics, The Radcliffe Infirmary.

‡ Clinical Reader and Honorary Consultant, Nuffield Department of Anaesthetics, The Radcliffe Infirmary.

Received from the Nuffield Department of Anaesthetics, The Radcliffe Infirmary, Oxford, United Kingdom, The Department of Anesthesiology, University of the Orange Free State, Bloemfontein, South Africa, and Department of Anesthesiology, Duke University, Durham, North Carolina. Accepted for publication August 17, 1988. Supported in part by Grants G8002204SA and G8306850SA from the British Medical Research Council and the Zoutendijk Scholarship Trust, South Africa.

Address reprint requests to Dr. Diedericks: The Nuffield Department of Anaesthetics, The Radcliffe Infirmary, Oxford OX2 6HE, United Kingdom.

end-tidal CO<sub>2</sub> at 5.3%. Anesthesia was maintained during surgical preparation with halothane 0.7–1.5%, supplied via a Fluotec® vaporizer (Cyprane, Keighly, England) calibrated with a refractometer. Temperature, monitored at the midesophagus, was maintained between 37° and 38° C by a heating element incorporated in the operating table.

An intravenous cannula was inserted via the femoral vein into the inferior vena cava for infusion of 0.9% saline at 37° C at a constant rate of 4 ml · kg<sup>-1</sup> · h<sup>-1</sup>. The left common carotid artery was exposed, and a rigid 8-Fr (2.76 mm outside diameter) polyethylene catheter was advanced to within 1 cm of the aortic valve for measurement of systemic arterial pressure with a Statham® pressure transducer and for blood sampling.

A left thoracotomy was performed, the fifth and sixth ribs removed, and the heart exposed and suspended in a pericardial cradle. A rigid 8-Fr cannula was inserted via a stab wound in the apical dimple into the left ventricle. LV pressure was recorded with a Stratham® pressure transducer connected to this cannula. An umbilical cannula was inserted via the outflow tract of the right ventricle into the pulmonary artery for determination of cardiac output, with the use of indocyanine green dye. The aortic root was dissected free of its fat pad and an appropriately sized electromagnetic flow transducer (Transflow 601®, Skalar Medical, Delft, Holland) was placed around it and connected to a flowmeter (SEM 230®, SE Laboratories, Feltham, United Kingdom).

The left anterior descending coronary artery (LAD) was dissected free distal to the second major diagonal branch. A 3–0 woven Dacron® suture was placed loosely around the artery in 31 dogs. A 2-mm electromagnetic flow probe (see above) was placed around the LAD in 29 dogs. A pneumatic occluder was positioned distal to the flow probe in 29 dogs. Previous observations in this laboratory showed that dissection of the LAD had no significant effect on regional wall function. §

#### REGIONAL MYOCARDIAL FUNCTION

Sonomicrometry was used to evaluate regional myocardial performance. The principles behind this technique are well described.<sup>12–14</sup> Two pairs of piezo electric crystals, components ±1 cm apart, were implanted into subendocardial myocardium. One pair was positioned in the anteroapical region (termed “apical” in this article), distal to the second diagonal branch of the LAD. The true apex was avoided, however, because quality of length signals may be poor in that region (fig. 1). The other pair was

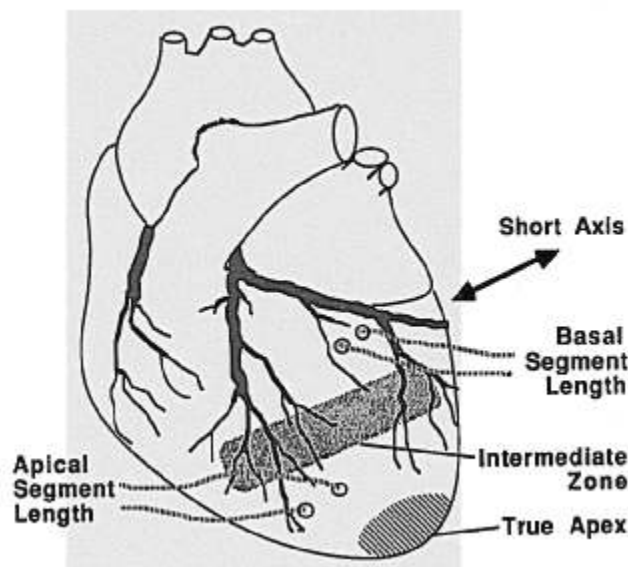

FIG. 1. Apical and basal placement of microcrystal pairs is illustrated. Experimental animals with crystals in the intermediate zone and true apical zone, indicated by the shaded areas, were excluded.

situated in the basal region, supplied by the left circumflex coronary artery (LC). Of the available studies, we deliberately excluded those with crystal pairs in the intermediate zone (fig. 1). Both pairs of crystals were oriented parallel to the short axis of the LV. Continuous analog output of distances between paired crystals (segment length) was recorded on a Minograf® 81 eight-channel recorder (Elema Scholander, Stockholm, Solna, Sweden).

#### GLOBAL HEMODYNAMICS

Aortic and LV pressures were recorded. Left ventricular rate of tension development (LVdP/dt) was obtained by on-line differentiation. Heart rate was calculated from the R-R interval on the ECG. Stroke volume was obtained by integration of the aortic flow signal and was calibrated by simultaneous determination of the cardiac output by dye dilution (indocyanine green).

#### EXPERIMENTAL PROTOCOL

The effects of three different combinations of drugs on regional function in the apical (LAD) and basal (LC) region were investigated: 1) the effect of nitrous oxide (N<sub>2</sub>O) added to an opiate; 2) the effect of stepped increases in halothane concentration; 3) the effect of an infusion of verapamil during isoflurane anesthesia.

#### Nitrous Oxide

After surgical preparation had been completed, halothane was discontinued. Fifteen minutes later, eight dogs received a loading dose of intravenous fentanyl, 100

§ Francis CM: The interaction between halothane anaesthesia and experimental myocardial ischaemia in the dog. D. Phil. Thesis, University of Oxford, 1982, pp 120–127.

TABLE 1. Hemodynamic Variables in the Fentanyl/Sufentanil Group ( $\bar{x} \pm 1$  SD, fentanyl n = 8, sufentanil n = 8, NS = no statistically significant difference)

| Condition                                 | Heart Rate (per min) | Mean Arterial Pressure (mmHg) | LVaP/dt <sub>max</sub> (mmHg/s) | Stroke Volume (ml)  | LVEDP (mmHg)      | Percentage Systolic Shortening |                    |
|-------------------------------------------|----------------------|-------------------------------|---------------------------------|---------------------|-------------------|--------------------------------|--------------------|
|                                           |                      |                               |                                 |                     |                   | Apex                           | Base               |
| 67% nitrogen in oxygen (control) Fentanyl | 111 ( $\pm 30$ )     | 111 ( $\pm 15$ )              | 3,030 ( $\pm 430$ )             | 29 ( $\pm 7.9$ )    | 5.3 ( $\pm 1.3$ ) | 20.2 ( $\pm 4.2$ )             | 16.1 ( $\pm 3.7$ ) |
|                                           | 119 ( $\pm 28$ )     | 112 ( $\pm 17$ )              | 2,700 ( $\pm 760$ )             | 29.4 ( $\pm 11.0$ ) | 4.9 ( $\pm 1.1$ ) | 23.9 ( $\pm 7.5$ )             | 17.5 ( $\pm 2.9$ ) |
| 67% nitrous oxide in oxygen Fentanyl      | 102 ( $\pm 20$ )     | 110 ( $\pm 11$ )              | 2,630 ( $\pm 430$ )*            | 28.8 ( $\pm 8.9$ )  | 5.6 ( $\pm 1.2$ ) | 18.4 ( $\pm 5.0$ )             | 15.3 ( $\pm 3.5$ ) |
|                                           | 123 ( $\pm 26$ )     | 116 ( $\pm 19$ )              | 2,580 ( $\pm 810$ )             | 28.5 ( $\pm 10.4$ ) | 5.8 ( $\pm 1.8$ ) | 21.4 ( $\pm 7.6$ )*            | 17.1 ( $\pm 3.1$ ) |
| 67% nitrogen in oxygen Fentanyl           | 106 ( $\pm 27$ )     | 116 ( $\pm 15$ )              | 3,150 ( $\pm 650$ )             | 29.0 ( $\pm 8.0$ )  | 4.8 ( $\pm 1.0$ ) | 19.9 ( $\pm 4.0$ )             | 16.0 ( $\pm 2.2$ ) |
|                                           | 129 ( $\pm 27$ )*    | 114 ( $\pm 19$ )*             | 2,960 ( $\pm 770$ )*            | 29.0 ( $\pm 9.0$ )  | 4.3 ( $\pm 0.7$ ) | 23.2 ( $\pm 7.1$ )             | 17.8 ( $\pm 3.5$ ) |

\*  $P < 0.05$ , compared with control.

$\mu\text{g} \cdot \text{kg}^{-1}$  over 5 min followed immediately by a continuous infusion of  $1 \mu\text{g} \cdot \text{kg}^{-1} \cdot \text{min}^{-1}$ . Eight dogs received a loading dose of sufentanil,  $30 \mu\text{g} \cdot \text{kg}^{-1}$  over 5 min followed immediately by a continuous infusion of  $0.3 \mu\text{g} \cdot \text{kg}^{-1} \cdot \text{min}^{-1}$ . During the following 45 min, instruments were recalibrated and acid-base status corrected where necessary. After the 45-min period of stabilization, baseline measurements were obtained at end expiration. After this,  $\text{N}_2\text{O}$  was substituted for nitrogen (*i.e.*, 67%  $\text{N}_2\text{O}$  in  $\text{O}_2$  instead of 67%  $\text{N}_2$  in  $\text{O}_2$ ) in all 16 dogs and the effects recorded after 15 min, at end expiration.  $\text{N}_2\text{O}$  was then again replaced by  $\text{N}_2$  and recordings repeated after 15 min to determine that recovery had occurred.

### Halothane

After surgical preparation had been completed in 15 dogs, a stabilization period of 1 h was allowed to elapse while instruments were recalibrated and acid-base status corrected if necessary. A minimum of 4 h elapsed between premedication and the beginning of the study. Control measurements were made at an inspired halothane concentration of 0.5%. The inspired halothane concentration was then increased in steps to 1.0%, 1.5%, and 2.0% and then decreased to 0.5% again. Each level of inspired halothane was maintained for 10 min before recordings were made. (Preliminary studies showed that circulatory stability was always achieved within 7 min after changing the halothane concentration.† All recordings were obtained during a 20-s period of apnea at end expiration.

### Verapamil

After completion of surgical preparation in nine dogs, halothane was replaced by isoflurane, 1% inspired concentration, delivered by a Cyprane® vaporizer (Cyprane, Keighly, England), calibrated by mass spectrometry. Blood gases were analyzed and, where necessary, ventilation adjusted to ensure normocarbia and sodium bicarbonate given to correct metabolic acidosis. Control measurements were recorded at end expiration 1 h after introduction of isoflurane. Verapamil was then given intravenously at a loading dose of  $250 \mu\text{g} \cdot \text{kg}^{-1}$  over 20 min, followed by a maintenance dose of  $60 \mu\text{g} \cdot \text{kg}^{-1} \cdot \text{h}^{-1}$ . The effects of verapamil were recorded at end expiration 30 min after the start of the maintenance dose.

### COMPUTATIONS

Regional dimensions were measured with the use of the following criteria: end-diastolic length (EDL) was

† Francis CM: The interaction between halothane anaesthesia and experimental myocardial ischaemia. D. Phil. Thesis, University of Oxford, 1982, p 112.

TABLE 2. Hemodynamic Variables in the Halothane-treated and Isoflurane/Verapamil-treated Groups.  
 $\bar{x} \pm 1$  SD; halothane n = 15, isoflurane n = 9)

| Condition                                                               | Heart Rate<br>(per min) | Mean Arterial Pressure<br>(mmHg) | LVdP/dt <sub>max</sub><br>(mmHg/s) | LVEDP<br>(mmHg) |
|-------------------------------------------------------------------------|-------------------------|----------------------------------|------------------------------------|-----------------|
| 0.5% halothane (control)                                                | 115 (±23)               | 81 (±12)                         | 1,420 (±260)                       | 4.0 (±2.1)      |
| 1.0% halothane                                                          | 113 (±25)               | 71 (±12)*                        | 1,110 (±220)*                      | 4.5 (±2.1)      |
| 1.5% halothane                                                          | 111 (±24)               | 59 (±12)*                        | 840 (±180)*                        | 5.2 (±2.6)      |
| 2.0% halothane                                                          | 104 (±22)†              | 46 (±12)*                        | 590 (±180)*                        | 5.3 (±2.0)      |
| 0.5% halothane                                                          | 115 (±31)               | 79 (±15)                         | 1,250 (±150)†                      | 4.4 (±2.4)      |
| 1% isoflurane (control)                                                 | 113 (±5)                | 93 (±3)                          | 1,600 (±120)                       | 4.9 (±0.5)      |
| 1% isoflurane + verapamil<br>60 μg · kg <sup>-1</sup> · h <sup>-1</sup> | 120 (±5)*               | 90 (±6)                          | 1,280 (±120)*                      | 5.9 (±0.3)†     |

\* P < 0.01, compared with control.

† P < 0.05, compared with control.

measured at the time of the beginning of the sharp upslope of the first derivative of LV pressure (LVdP/dt) signal; end-systolic length (ESL) was measured at the time the aortic flow first returned to zero. Systolic shortening (SS) was expressed as percentage of EDL, with the use of the following formula:

$$\%SS = (EDL - ESL)/EDL \times 100 \text{ (Theroux et al. }^{13})$$

The minimum length during systole (L<sub>min</sub>S) was also measured and substituted for ESL when it was shorter than the latter.

Absolute difference between %SS in control (opiate alone; 0.5% halothane; 1.0% isoflurane) and altered conditions (opiate + N<sub>2</sub>O; 1.0%, 1.5%, 2.0% halothane; 1.0% isoflurane + verapamil) were calculated and compared in LAD and LC regions. SS at altered conditions was also expressed as percentage of control (normalized %SS), and the change in this index was also compared between apical and basal regions.

Two-way analysis of variance (ANOVA) with a Duncan and Bonferroni option from the SAS® statistical computer package (VMS SAS Production Release 5.16, 1986 SAS Institute, Cary, North Carolina) was used as appropriate. Wilcoxon ranked paired tests were used where data did not follow a normal distribution. Apical and basal shortening were compared with paired *t* tests at each stage of the studies. The difference between apical and basal regions was also compared over all levels of halothane concentration with a two-way ANOVA, and multiple comparisons between the levels of concentration were obtained with the use of the Tukey test.

## Results

### GLOBAL HEMODYNAMICS

Table 1 summarizes global and regional hemodynamic data in the fentanyl and sufentanil subsets. No statistically significant difference between the subsets could be demonstrated for any variable at any stage. With the with-

drawal of N<sub>2</sub>O, all hemodynamic values returned to control in the fentanyl subset, whereas heart rate and LVdP/dt<sub>max</sub> were higher in the sufentanil subset.

Table 2 summarizes systemic hemodynamic data in the halothane- and isoflurane/verapamil-treated groups. Note that left ventricular end-diastolic pressure (LVEDP) remained constant throughout all the stages in the N<sub>2</sub>O-treated and halothane-treated groups (tables 1 and 2), whereas a statistically significant but small (1 mmHg) increase occurred with isoflurane plus verapamil (table 2). Mean arterial pressure decreased significantly at higher concentrations of halothane but not when verapamil was added to isoflurane. In both the halothane-treated and isoflurane/verapamil-treated groups, LVdP/dt<sub>max</sub> decreased significantly compared with control (0.5% halothane and 1.0% isoflurane). In the halothane-treated group, LVdP/dt<sub>max</sub> did not return to control value at the end of the dose-response study.

### REGIONAL WALL MOTION

The effect of N<sub>2</sub>O on regional function is shown in table 3. Because there were no differences for both global and regional function between the fentanyl- and sufentanil-treated groups (see table 1), the results are presented as pooled data. Under control conditions (33% O<sub>2</sub> in N<sub>2</sub>), there was a highly significant difference in percentage systolic shortening (%SS) when apex was compared with base (P < 0.01). When 67% N<sub>2</sub>O replaced N<sub>2</sub>, this difference persisted, the apical region being still more active than the basal region. N<sub>2</sub>O caused significantly greater depression of percentage systolic shortening and of normalized percentage systolic shortening in the apex than in the base of the ventricle (F[1, 5] = 7.3280, P < 0.025).

Figure 2 shows the effect of halothane on %SS. At 0.5% and 1.0% inhaled halothane, statistically significant differences in shortening between LAD and LC regions were noted. Although the LAD region appeared more dynamic at more depressed levels of inotropy (1.5% and 2% halothane), differences in apical and basal shortening no longer

TABLE 3. The Effect of Nitrous Oxide on Shortening in Different Regions of the Left Ventricle\*

| Region | Percentage Systolic Shortening |                             |                               | Effect of Nitrous Oxide   |                                         |
|--------|--------------------------------|-----------------------------|-------------------------------|---------------------------|-----------------------------------------|
|        | Opiates (control)              | Opiates + 67% Nitrous Oxide | Opiates (after nitrous oxide) | Absolute Reduction in %SS | Reduction in %SS, Normalized to Control |
| Apex   | 21.9 ( $\pm 6.2$ )             | 19.9 ( $\pm 6.4$ )          | 21.6 ( $\pm 6.1$ )            | -1.97 ( $\pm 1.8$ )       | -10.4 ( $\pm 2.2$ )%                    |
| Base   | 16.8 ( $\pm 3.3$ )             | 16.2 ( $\pm 3.4$ )          | 16.9 ( $\pm 3.0$ )            | -0.82 ( $\pm 1.25$ )      | -3.9 ( $\pm 1.6$ )%                     |

\* Absolute reduction in %SS = absolute change in percentage systolic shortening when nitrous oxide is added. Reduction in %SS, normalized to control = difference in %SS between control and nitrous oxide stages, as percentage of control stage. Pooled data: fentanyl  $n = 8$ ,

sufentanil  $n = 8$ ;  $\bar{x} \pm 1$  SD; NS = not statistically significant.

\*  $P < 0.01$ .

†  $P < 0.05$ .

reached statistical significance. Absolute differences in %SS between control (0.5% halothane) and the other stages (1.0%, 1.5% and 2.0%) of halothane are shown in figure 3. The decreases in shortening brought about by increasing halothane concentration were significantly greater in the apical than in the basal regions at every increased concentration. Decreases in normalized %SS are shown in figure 4. Each increase above 1% halothane caused a significantly greater decrease in normalized shortening in the apical than basal region ( $F[3, 39] = 12.5841$ ,  $P < 0.005$ , Tukey critical difference = 2.0322,  $P < 0.05$ ).

Table 4 shows the effect of verapamil on regional myocardial shortening. The significant difference between apical and basal shortening under 1.0% isoflurane was abolished by the addition of verapamil. The effect of verapamil on %SS was significantly greater in the apical than in the basal region ( $F[1, 8] = 4.7977$ ,  $P < 0.005$ ).

### Discussion

The experimental model used in these studies is well established for assessment of regional wall shorten-

ing.<sup>9-11,13-15</sup> Because differences in regional function may become too small to detect when crystal pairs are placed too near each other,<sup>7</sup> only experiments in which apical and basal crystal pairs were placed well apart were included for analysis. The true apical area was also avoided because quality of subendocardial micrometry signals here may be poor because of geometric displacement. Differences in apical and basal function cannot be ascribed to the open-chest dog model because similar differences were demonstrated in awake, closed-chest dogs<sup>16</sup> and have been observed in humans.<sup>5,8</sup> The morphine and thiopental used for premedication and induction of anesthesia could have influenced regional function, although this effect should be negligible<sup>17</sup> because measurements were started 3-4 h after these drugs had been given.

Previous studies have examined regional function when different regions were subjected to different circumstances. Most frequently myocardial ischemia was introduced in either LAD or LC segments and the function in the compromised segment studied and compared with that of the normal segment.<sup>11,18-20</sup> Alternatively, the LAD and the LC were differentially perfused with positive or

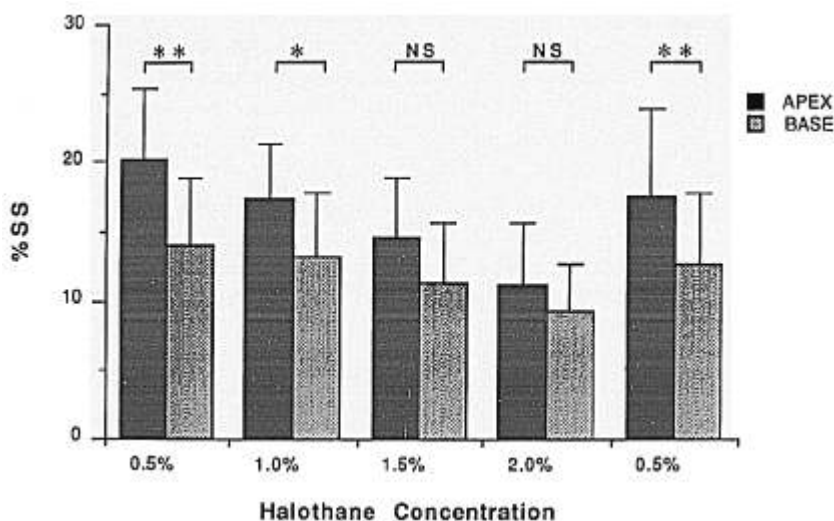

FIG. 2. Percentage systolic shortening (%SS) at each inspiratory halothane concentration for apical and basal regions. Values are mean, bar = 1 SD;  $N = 15$ ; NS = not statistically significant; \* $P < 0.05$ ; \*\* $P < 0.01$ . As halothane-induced depression increases (1.5 and 2.0% halothane), the significant differences in regional performance are suppressed. On returning to control halothane concentration, regional differences reappear.

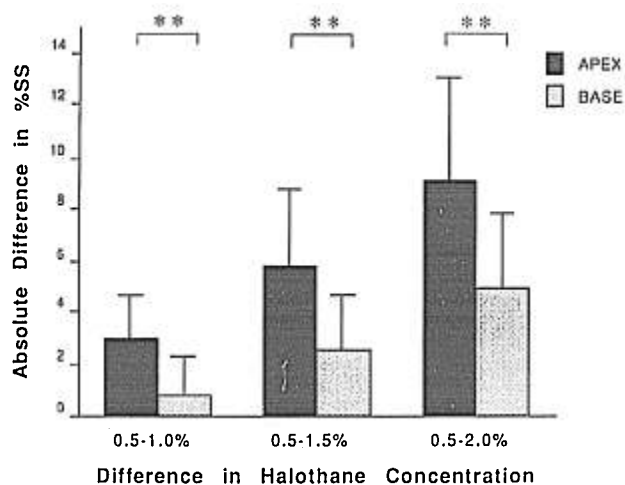

FIG. 3. Absolute reductions in percentage systolic shortening (%SS) as a function of increases in halothane concentration. Values are mean, bar = 1 SD; N = 15; \*\*P < 0.01. Reductions in %SS are significantly greater in the apex throughout the dose-response study.

negative inotropic agents and regional function compared in different segments.<sup>21,22</sup> The findings in these experiments could satisfactorily be explained by an interconnected two-compartment model in which ischemic cardiac muscle in series with normal muscle is stretched during contraction.<sup>23-25</sup> In the present study, there was no interference with the coronary circulation and thus apical and basal regions were subjected to exactly the same interventions. Any difference in performance could thus be ascribed to the inherent characteristics of these regions of the ventricle.

The apical region was always more active than the basal region, exhibiting greater systolic shortening. When depression was increased, the more active apical region was depressed more, both in absolute and relative terms, than the less active basal region (tables 3 and 4, and figs. 3 and 4). Although a linear correlation ( $r = 0.97$ ) with a slope of 1.45 can be fit to the relationship between average %SS in apical and basal regions for all interventions pooled together, the best fit ( $r = 0.98$ ) was obtained with a log-

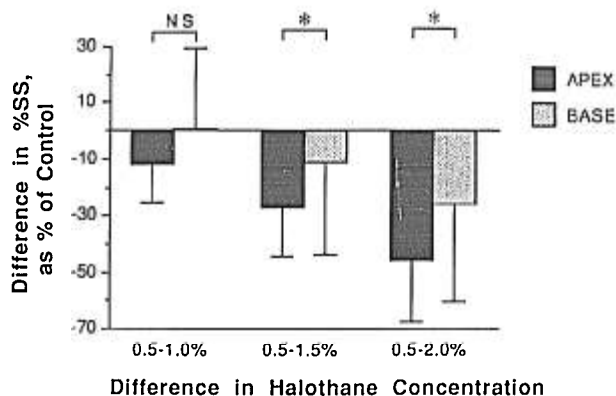

FIG. 4. Difference in percentage systolic shortening (%SS), as percentage of control plotted as a function of increases in halothane concentration. Values are mean, bar = 1 SD; N = 15; \*P < 0.05; NS = not significant. Because in both segments values were normalized to a control shortening of 100%, differences in effects of halothane on different segments are independent of magnitude of initial shortening.

arithmic function (fig. 5). The fact that all the points lie above the identity line shows that the apex is more active than the base. The good fit of the logarithmic line illustrates that the apex is depressed more than the base with negative inotropic interventions. This tends to abolish differences between apex and base when function is severely depressed.

The differences in regional performance could be explained by a difference in sarcomere length. Laks *et al.* demonstrated longer sarcomeres in the apex than in the base of the LV.<sup>26</sup> In longer sarcomeres, more myofibrillar length is available for contraction before excess overlap of actin and myosin prevents further shortening. Differences between apical and basal shortening may thus be a manifestation of the Frank-Starling law.<sup>27</sup>

However, the greater effect of negative inotropic interventions on the apex is not so readily explained. The effects of volatile anesthetics and calcium channel blocking drugs on the myocardial cell are complex and not fully understood.<sup>28-33</sup> Therefore, a discussion of the mechanism of the differential effects of these drugs on regional

TABLE 4. The Effect of Verapamil on Shortening in Different Regions of the Left Ventricle\*

| Region | Percentage Systolic Shortening |                                                                         | Effect of Verapamil       |                                         |
|--------|--------------------------------|-------------------------------------------------------------------------|---------------------------|-----------------------------------------|
|        | 1% Isoflurane (control)        | 1% Isoflurane + Verapamil (60 µg · kg <sup>-1</sup> · h <sup>-1</sup> ) | Absolute Reduction in %SS | Reduction in %SS, Normalized to Control |
| Apex   | 18.3 (±5.8)                    | 10.1 (±6.3)                                                             | -8.49 (±2.9)              | -48.6 (±20.7)%                          |
| Base   | 13.3 (±2.5)                    | 9.0 (±3.2)                                                              | -4.32 (±3.0)              | -32.3 (±25.7)%                          |

\* Absolute reduction in %SS = absolute change in percentage systolic shortening when verapamil is added to isoflurane. Reduction in %SS, normalized to control = difference in %SS between isoflurane and isoflurane plus verapamil, as percentage of control. N = 9;  $\bar{x} \pm 1$  SD;

NS = not statistically significant.

\* P < 0.05.

† P < 0.01.

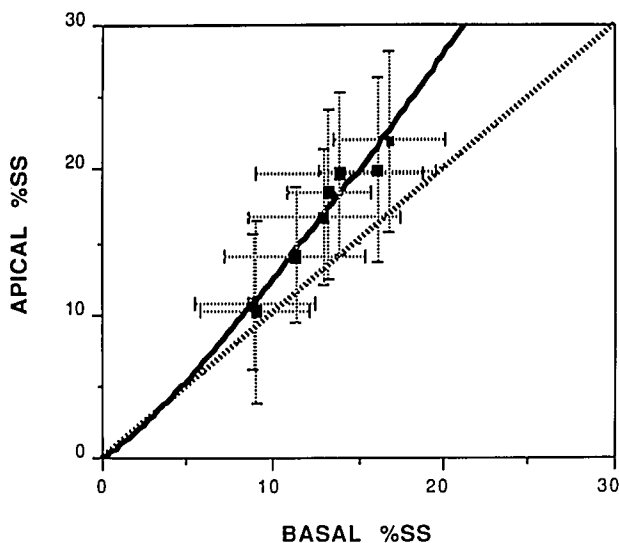

FIG. 5. Relationship between average values for percentage systolic shortening (%SS) in the apical region and the corresponding average %SS values in the basal region. Values are mean, bar = 1 SD, data for all the experiments pooled. A logarithmic curve fit ( $r = 0.98$ ) fits the distribution of mean values better than a linear fit ( $r = 0.97$ ). This is to be expected, because negative inotropic interventions suppress the apex more than the base. Note, however, that the line differs from identity line (dotted line), illustrating that apical shortening differs from basal shortening.

function can only be speculative. However, the longer sarcomere lengths in the apex may afford a larger number of binding sites for halothane or verapamil. This may influence the size of or sensitivity to calcium fluxes,<sup>34,35</sup> thus making the region more susceptible to the cardiodepressive effects of these drugs, which are known to modify calcium ion fluxes.<sup>30-33</sup>

If calcium channels are not involved, changes in regional myocardial blood flow may be responsible for the greater effect of halothane, verapamil, and  $N_2O$  on apical as opposed to basal function. It has been shown that anesthetics can alter transmural blood flow.<sup>36,37</sup> It has also been shown that myocardial function is very sensitive to blood flow, particularly subendocardial blood flow.<sup>38-40</sup> Although the specificity of regional wall motion abnormalities as an indicator of blood flow is still controversial,\*\* the question arises whether anesthetics may modify regional or transmural blood flow enough to explain the greater depression of the apex. In this respect, hypotension may play a role. With normal blood pressure, apex and base should get the same relative blood supply and oxygen delivery. Severe hypotension may disturb the normal distribution of blood flow to such an extent that

\*\* Thys DM: The intraoperative assessment of regional myocardial performance: Is the cart before the horse? (editorial) *Journal of Cardiothoracic Anesthesia* 1:273-275, 1987.

one region may exhibit a greater depression of function than the other. Hemodynamic data in this study do not support this hypothesis. Although deeper levels of halothane or administration of verapamil abolished the differences in regional shortening, a significant reduction in blood pressure occurred only with halothane and not with verapamil.

Differences in wall tension may play an important role. According to the law of La Place, wall tension should be less in the apex because of the smaller radius. However, several groups<sup>41-43</sup> have shown that the apical myocardium is thinner: this could partly offset the effect of the smaller radius. Calculations of wall tension have shown wall tension to be higher in the basal region than in the apex.<sup>43,44</sup> Thus, more tension would develop in the basal region but the basal region would shorten less during each contraction, whereas less tension would develop in the apical region and the apical region would shorten more. Moreover, the greater amount of fibrous tissue in the basal region, necessary to anchor the valvular apparatus, may contribute to the reduced shortening of the basal region.<sup>7</sup> Differences in wall tension may explain both initial differences in function and the differential effect of negative inotropic interventions.

Because of differences in regional contraction and differential effects of drugs on segmental function of the normal LV, results from different studies can only be compared if they examined similar segments. The findings of Le Winter *et al.* suggested that regional differences exist even between segments that are not far apart.<sup>7</sup> Some of the confusion and inconsistency of findings regarding regional function could be explained by the fact that the function of different areas of the LV have been examined.<sup>10,11,36,45,46</sup> In studies of myocardial ischemia, the effect of reducing coronary blood flow could be expected, on the strength of regional differences, to be greater in the more dynamic apical region than in the less dynamic basal region. It is clear that the apex cannot be used as a "control" for the base.

The clinical implications of the differences in regional shortening may be that the LV apex is more involved with ejection and the base with firmness of the ventricular outflow tract during ejection, as in the right ventricle.<sup>47</sup> During anesthesia, hemodynamic depression may result largely from exaggerated depression of the more active regions of the LV.

A limitation of this study is that no positive inotropic intervention was examined. However, a recent study by Hittinger *et al.*<sup>16</sup> has demonstrated that, under different loading conditions, as well as increased inotropy, the apex is always more active than the base, and the slope of the relationship of apical to basal myocardial shortening remains relatively constant during these interventions.

In summary, there are regional differences in function within the LV, the apical region being more active than the basal region. Negative inotropic interventions, such as increasing anesthetic concentration, adding N<sub>2</sub>O, or administering verapamil, cause relatively greater depression of apical contraction and tend to decrease these differences. The nonhomogenous behavior of the LV should be borne in mind when regional LV function is evaluated.

The authors thank the following persons who were involved with the execution of the different experiments: Professors D. M. Philbin and E. Lowenstein; Drs. C. C. Arvieux, J. G. Ramsay, J. G. Stone, G. Drummond, J. J. Lehot, C. M. Francis, G. R. Cutfield, and M. Vidcoq; and W. A. Ryder and L. A. Jones; Dr. Z. Metha who assisted in the statistical analysis; and A. L. Nunn who assisted in preparing the manuscript.

### References

1. Priebe H-J: Differential effects of isoflurane on right and left ventricular performances, and on coronary, systemic, and pulmonary hemodynamics in the dog. *ANESTHESIOLOGY* 66:262-272, 1987
2. Vidcoq M, Arvieux CC, Ramsay JG, Foëx P, Stone JG, Ryder WA, Jones LA: The association isoflurane-verapamil causes regional myocardial dysfunction in the dog. *ANESTHESIOLOGY* 67:635-641, 1987
3. Chelly JE, Rogers K, Hysing ES, Taylor A, Hartley C, Merin RG: Cardiovascular effects of and interaction between calcium blocking drugs and anesthetics in chronically instrumented dogs. I. Verapamil and halothane. *ANESTHESIOLOGY* 64:560-567, 1986
4. Coetzee A, Fourie P, Badenhorst E: Effect of halothane, enflurane and isoflurane on the end-systolic pressure-length relationship. *Can J Anaesth* 34:351-357, 1987
5. Liedtke AJ, Gault JH, Leaman DM, Blumenthal MS: Geometry of left ventricular contraction in the systolic click syndrome. *Circulation* 47:27-35, 1973
6. Kong Y, Morris JJ, McIntosh HD: Assessment of regional myocardial performance from biplane coronary cineangiograms. *Am J Cardiol* 27:529-537, 1971
7. Le Winter MM, Kent RS, Kroener JM, Carew TE, Covell JW: Regional differences in myocardial performance in the left ventricle of the dog. *Circ Res* 37:191-199, 1975
8. Pandian NG, Skorton DJ, Collins SM, Falsetti HL, Burke ER, Kerber RE: Heterogeneity of left ventricular segmental wall thickening and excursion in 2-dimensional echocardiograms of normal human subjects. *Am J Cardiol* 51:1667-1673, 1983
9. Philbin DM, Foëx P, Drummond G, Lowenstein E, Ryder WA, Jones LA: Postsystolic shortening of canine left ventricle supplied by a stenotic coronary artery when nitrous oxide is added in the presence of narcotics. *ANESTHESIOLOGY* 62:166-174, 1985
10. Lowenstein E, Foëx P, Francis CM, Davies WL, Yusuf S, Ryder WA: Regional ischemic ventricular dysfunction in myocardium supplied by a narrowed coronary artery with increasing halothane concentration in the dog. *ANESTHESIOLOGY* 55:349-359, 1981
11. Francis CM, Foëx P, Lowenstein E, Glazebrook LW, Davies WL, Ryder WA, Jones LA: Interaction between regional myocardial ischaemia and left ventricular performance under halothane anaesthesia. *Br J Anaesth* 54:965-979, 1982
12. Bugge-Asperheim B, Leraand S, Kil F: Local dimensional changes of the myocardium measured by ultrasonic technique. *Scand J Clin Lab Invest* 24:361-371, 1969
13. Theroux P, Franklin D, Ross J Jr, Kemper WS: Regional myocardial function during acute coronary artery occlusion and its modification by pharmacologic agents in the dog. *Circ Res* 35: 896-908, 1974
14. Hagl S, Hemish W, Meisner H, Erben R, Baum M, Mendler N: The effect of hemodilution on regional myocardial function in the presence of coronary stenosis. *Basic Res Cardiol* 72:344-364, 1977
15. Cutfield GR, Francis CM, Foëx P, Lowenstein E, Davies WL, Ryder WA: Myocardial function and critical constriction of the left anterior descending coronary artery: Effects of enflurane. *Br J Anaesth* 52:953-954P, 1980
16. Hittinger L, Crozatier B, Belot J-P, Pierrot M: Regional ventricular segmental dynamics in normal conscious dogs. *Am J Physiol* 253:H713-H719, 1987
17. Chamberlain JH, Seed RGFL, Chung DCW: Effect of thiopentone on myocardial function. *Br J Anaesth* 49:865-870, 1977
18. Ramsay JG, Arvieux CC, Foëx P, Philbin DM, Jeavons P, Ryder WA, Jones LA: Regional and global myocardial function in the dog when nitrous oxide is added to halothane in the presence of critical coronary artery constriction. *Anesth Analg* 65:431-436, 1986
19. Leone BJ, Lehot J-J, Francis CM, Cutfield GR, Foëx P:  $\beta$ -Blockade reverses regional dysfunction in ischemic myocardium. *Anesth Analg* 66:607-614, 1987
20. Doyle RL, Foëx P, Ryder WA, Jones LA: Differences in ischemic dysfunction after gradual and abrupt coronary occlusion: Effects on isovolumic relaxation. *Cardiovasc Res* 21:507-514, 1987
21. Kaseda S, Tomoike H, Ogata I: End-systolic pressure-length relations during changes in regional contractile state. *Am J Physiol* 247:H768-H774, 1984
22. Kaseda S, Tomoike H, Ogata I, Nakamura M: End-systolic pressure-volume, pressure-length, and stress-strain relations in canine hearts. *Am J Physiol* 249:H648-H654, 1985
23. Tennant R, Wiggers CJ: The effect of coronary occlusion on myocardial contraction. *Am J Physiol* 112:351-361, 1935
24. Tyberg JV, Parmely WW, Sonnenblick EH: In vitro studies of myocardial asynchrony and regional hypoxia. *Circ Res* 25:569-579, 1969
25. Wiegner AW, Allen GJ, Bing OHL: Weak and strong myocardium in series: Implications for segmental dysfunction. *Am J Physiol* 235:H776-H783, 1978
26. Laks MM, Nisenson MJ, Swan HJC: Myocardial cell and sarcomere lengths in the normal dog heart. *Circ Res* 21:671-678, 1967
27. Braunwald E, Ross J Jr, Sonnenblick EH: Mechanisms of contraction of the normal and failing heart. *N Engl J Med* 277:853-863, 1967
28. Smith HJ, Goldstein RA, Griffith JM, Kent KM, Epstein SE: Regional contractility. Selective depression of ischemic myocardium by verapamil. *Circulation* 54:629-635, 1976
29. Kroll DA, Knight PR: Antifibrillatory effects of volatile anesthetics in acute occlusion/reperfusion arrhythmias. *ANESTHESIOLOGY* 61:657-661, 1984
30. Lynch C: Are volatile anesthetics really calcium channel blockers? (editorial) *ANESTHESIOLOGY* 66:644-646, 1984
31. Lynch C, Vogel S, Sperelakis N: Halothane depression of myocardial slow action potentials. *ANESTHESIOLOGY* 55:360-368, 1981
32. Lynch C: Differential depression of myocardial contractility by halothane and isoflurane in vitro. *ANESTHESIOLOGY* 64:620-631, 1986



33. Rusy BF, Komai H: Anesthetic depression of myocardial contractility: A review of possible mechanisms. *ANESTHESIOLOGY* 67:745-766, 1987
34. Allen DG, Kentish JC: The cellular basis of the length-tension relation in cardiac muscle. *J Mol Cell Cardiol* 17:821-840, 1985
35. Winegrad S: Regulation of cardiac contractile proteins. Correlations between physiology and biochemistry. *Circ Res* 55:565-574, 1984
36. Tatekawa S, Traber KB, Hantler CB, Tait AR, Gallagher KP, Knight PR: Effects of isoflurane on myocardial blood flow, function and oxygen consumption in the presence of critical coronary stenosis in dogs. *Anesth Analg* 66:1073-1082, 1987
37. Buffington CW, Romson JL, Levine A, Duttlinger NC, Huang AH: Isoflurane induces coronary steal in a canine model of chronic coronary occlusion. *ANESTHESIOLOGY* 66:280-292, 1987
38. Vatner SF: Correlation between acute reductions in myocardial blood flow and function in conscious dogs. *Circ Res* 47:201-207, 1980
39. Gallagher KP, Matsusaki M, Koziol JA, Kemper WS, Ross J Jr: Regional myocardial perfusion and wall thickening during ischemia in conscious dogs. *Am J Physiol* 247:H727-H738, 1984
40. Akaishi M, Sheiner RM, Mercier RJ, Naccarella FF, Agarwal JB, Helfant RH, Weintraub WS: Relation between left ventricular global and regional function and the extent of myocardial ischemia in the canine heart. *J Am Coll Cardiol* 6:104-112, 1985
41. Streeter DD, Spotnitz HM, Patel DP, Ross J Jr, Sonnenblick EH: Fiber orientation in the canine left ventricle during diastole and systole. *Circ Res* 24:339-347, 1969
42. Eber LM, Greenberg HM, Cooke JM, Gorlin R: Dynamic changes in left ventricular free wall thickness in the human heart. *Circulation* 39:455-464, 1969
43. Burten AC: Importance of the shape and size of the heart (editorial). *Am Heart J* 54:801-810, 1957
44. Woods RH: A few applications of a physical theorem to membrane in the human body in a state of tension. *J Anat Physiol* 26:362-370, 1892
45. Priebe H-J, Foëx P: Isoflurane causes regional myocardial dysfunction in dogs with critical coronary artery stenosis. *ANESTHESIOLOGY* 66:293-300, 1987
46. Buffington CW: Impaired systolic thickening associated with halothane in the presence of coronary stenosis is mediated by changes in hemodynamics. *ANESTHESIOLOGY* 64:632-640, 1986
47. Raines RA, LeWinter MM, Covell JN: Regional shortening patterns in canine right ventricle. *Am J Physiol* 231:1395-1400, 1976
